# Supplementary material for: Ubiquitin ligase TRIM3 controls hippocampal plasticity and learning by regulating synaptic γ-actin levels
Source: PubMed Central journal article supplement — J Cell Biol. 2015 Nov 9;211(3):569–86. doi: 10.1083/jcb.201506048 (PMC4639863; doi:10.1083/jcb.201506048), 2015-11-09
Supplement: supp_jcb.201506048_JCB_201506048_sm.pdf [file supp_jcb.201506048_JCB_201506048_sm.pdf]

Schreiber et al., <http://www.jcb.org/cgi/content/full/jcb.201506048/DC1>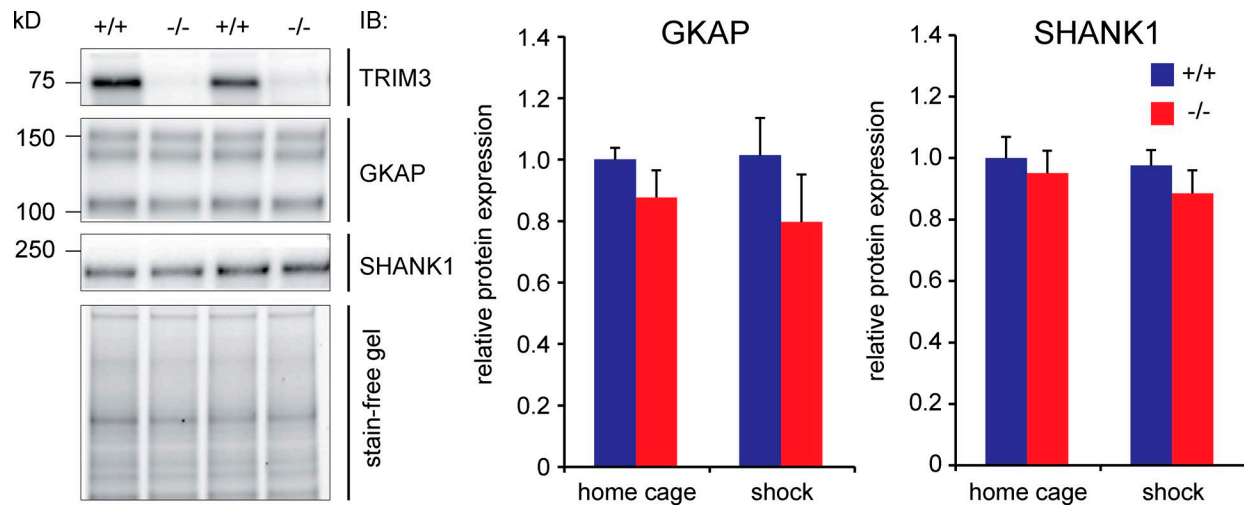

Figure S1. **GKAP and SHANK1 levels are not affected in *Trim3*<sup>-/-</sup> mice.** Hippocampal synapse-enriched fractions were prepared from wild-type and *Trim3*<sup>-/-</sup> mice under control conditions (home cage) and 2 h after contextual fear conditioning (shock). Samples were immunoblotted and stained for GKAP and SHANK1. Normalized protein levels were calculated by dividing immunoblot (IB) signal intensities by the total protein intensities (stain-free gel) and expressed relative to wild-type levels. No differences in normalized protein levels were found for either GKAP (wild-type home cage:  $1 \pm 0.04$ , *Trim3*<sup>-/-</sup> home cage:  $0.88 \pm 0.09$ , wild-type shock:  $1.01 \pm 0.04$ , *Trim3*<sup>-/-</sup> shock:  $0.80 \pm 0.15$ ) or SHANK1 (wild-type home cage:  $1 \pm 0.07$ , *Trim3*<sup>-/-</sup> home cage:  $0.95 \pm 0.07$ , wild-type shock:  $0.98 \pm 0.05$ , *Trim3*<sup>-/-</sup> shock:  $0.89 \pm 0.07$ ; means  $\pm$  SEM,  $n = 4$  per genotype).

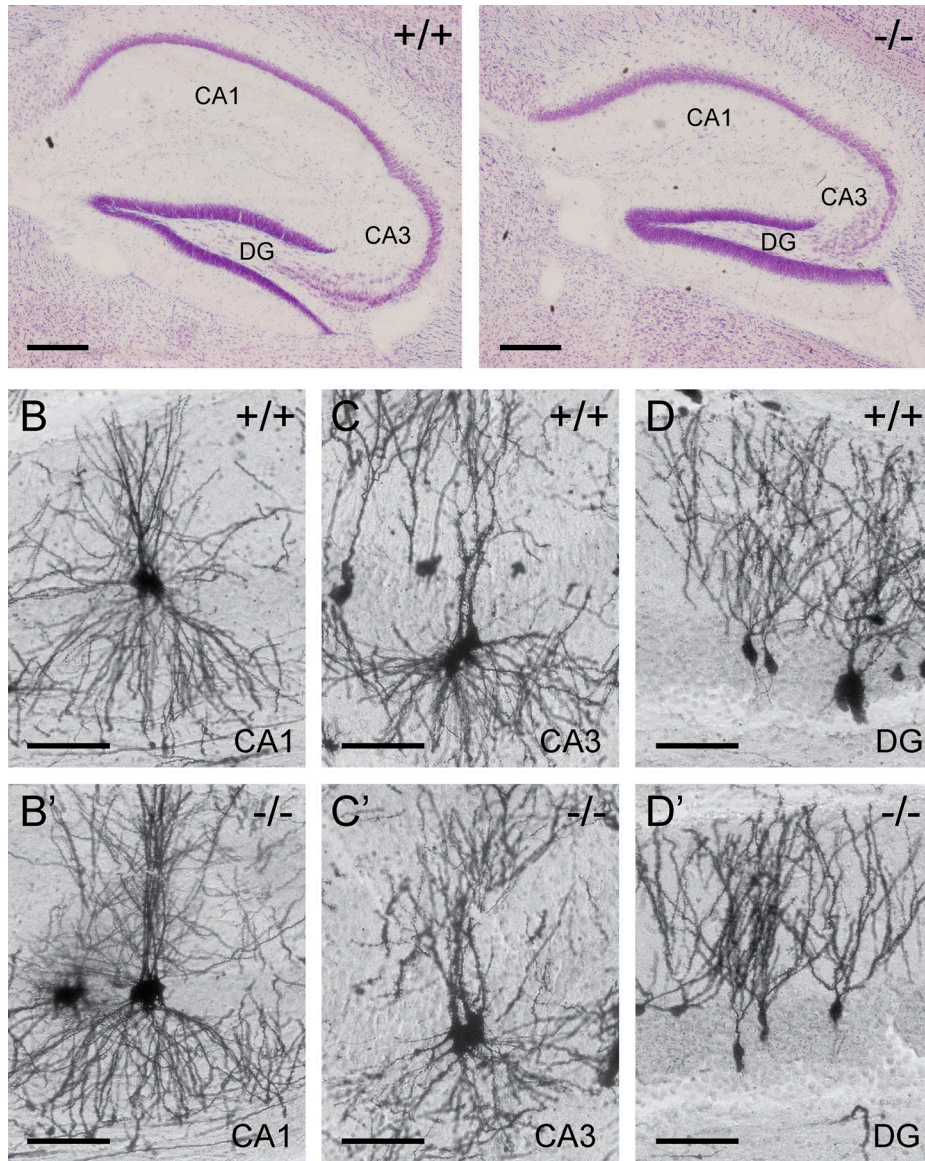

Figure S2. **Hippocampal morphology and cytoarchitecture are not affected in *Trim3*<sup>-/-</sup> mice.** (A) Nissl staining showed normal gross morphology of the hippocampus in *Trim3*<sup>-/-</sup> mice (A) compared with wild-type controls (A') at 4 mo of age. Bars, 250  $\mu$ m. (B–D) Golgi-cox staining showed normal cellular morphology of CA1 (B) and CA3 (C) pyramidal neurons and of granule neurons in the dentate gyrus (D) in *Trim3*<sup>-/-</sup> mice compared with wild-type controls (B'–D'). CA, cornu amonis; DG, dentate gyrus. Bars, 50  $\mu$ m.

Table S1. Behavioral analysis of *Trim3*<sup>-/-</sup> mice at 8 mo of age

| Test/test measure                               | Unit              | Wild type (n = 14) | Knockout (n = 12) | P-value |
|-------------------------------------------------|-------------------|--------------------|-------------------|---------|
| <b>Open field/Ethovision</b>                    |                   |                    |                   |         |
| Number of entries into the center area          |                   | 37.29 ± 3.67       | 41.08 ± 4.06      | 0.493   |
| Time spent in the center area                   | s                 | 65.0 ± 6.4         | 85.8 ± 20.0       | 0.303   |
| Total distance traveled                         | cm                | 4,729 ± 341        | 5,290 ± 303       | 0.238   |
| <b>Open Field/SEE analysis/velocity</b>         |                   |                    |                   |         |
| Lingering progression threshold speed           | cm/s              | 12.52 ± 0.67       | 14.83 ± 0.78      | 0.034   |
| Median of move segment maximum speed            | cm/s              | 21.55 ± 1.10       | 24.94 ± 1.09      | 0.040   |
| Quantile 95 of move segment maximum speed       | cm/s              | 30.22 ± 1.13       | 34.18 ± 1.33      | 0.031   |
| Lingering mean speed                            | cm/s              | 1.77 ± 0.10        | 1.84 ± 0.14       | 0.687   |
| Median of lingering segment maximum speed       | cm/s              | 4.41 ± 0.40        | 4.07 ± 0.35       | 0.540   |
| <b>Open field/SEE analysis/acceleration</b>     |                   |                    |                   |         |
| Latency to maximum half speed                   | sec               | 10.71 ± 2.87       | 13.01 ± 4.07      | 0.642   |
| Median segment acceleration to maximum speed    | cm/s <sup>2</sup> | 13.59 ± 0.36       | 14.55 ± 0.57      | 0.155   |
| <b>Open field/SEE analysis/other</b>            |                   |                    |                   |         |
| Number of progression segments                  | segments          | 112.5 ± 8.3        | 114.8 ± 6.0       | 0.828   |
| Median length of progression segments           | cm                | 23.83 ± 2.03       | 30.66 ± 1.99      | 0.026   |
| Median duration of progression segments         | s                 | 1.58 ± 0.08        | 1.76 ± 0.06       | 0.075   |
| Quantile 5 of duration of progression segments  | s                 | 0.59 ± 0.05        | 0.67 ± 0.03       | 0.238   |
| Quantile 95 of duration of progression segments | s                 | 3.35 ± 0.15        | 3.68 ± 0.13       | 0.119   |
| Number of stops per distance                    | segments/cm       | 0.03 ± 0.00        | 0.03 ± 0.00       | 0.109   |
| Time proportion of lingering episodes           |                   | 0.67 ± 0.03        | 0.63 ± 0.02       | 0.389   |
| Median radius of turn                           | cm                | 75.43 ± 4.17       | 83.35 ± 5.29      | 0.245   |
| Median turn rate                                | degrees/s         | 13.23 ± 0.54       | 13.45 ± 0.79      | 0.812   |

Entries show mean ± SEM values unless otherwise indicated.

**Table S2 is provided as an Excel table and shows a list of proteins identified as potential TRIM3 substrates.**
